# Supplementary material for: Siloxane surfactant induced self-assembly of gold nanoparticles and their application to SERS
Source: Royal Society of Chemistry journal article supplement (doi:10.1039/c1ce05715d), 2011-01-01
Supplement: c1ce05715d.pdf [file c1ce05715d.pdf]

## Electronic Supplementary Information

### **Siloxane Surfactant Induced Self-Assembly of Gold Nanoparticles and Their Application to SERS**

**Han Jia<sup>a</sup>, Xiangtao Bai<sup>a</sup>, Na Li<sup>b</sup>, Li Yu<sup>a</sup>, and Liqiang Zheng<sup>a\*</sup>**

a. Key Laboratory of Colloid and Interface Chemistry, Shandong University, Ministry  
of Education, Jinan, 250100, China.

b. College of Chemistry, Chemical Engineering and Materials Science, Shandong  
Normal University, Jinan, 250014, China.

Tel.: +86 531 88366062

Fax: +86 531 88564750

E-mail address: [lqzheng@sdu.edu.cn](mailto:lqzheng@sdu.edu.cn)

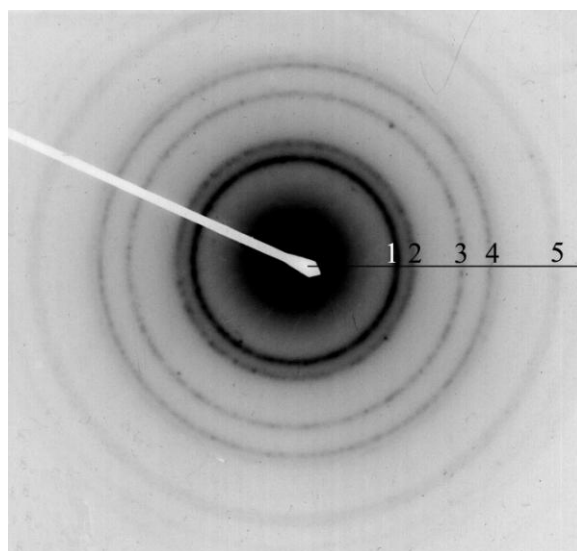

Figure S1. The corresponding electron diffraction pattern of the gold nanoparticle  
(1 to 5 corresponding to  $\{111\}$   $\{200\}$   $\{220\}$   $\{311\}$  and  $\{331\}$ ).

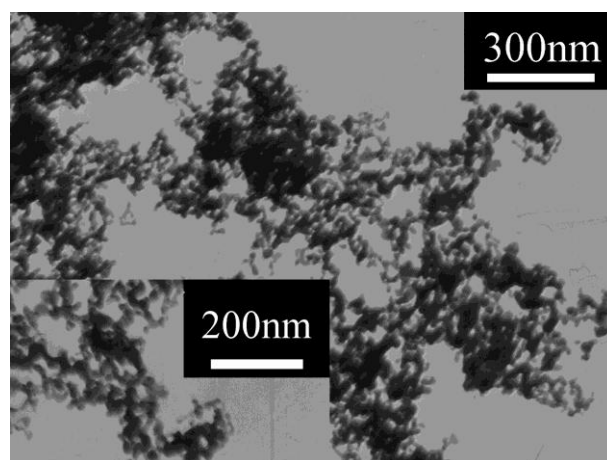

Figure S2. TEM image of aggregates formed when ascorbic acid was replaced by sodium borohydride.

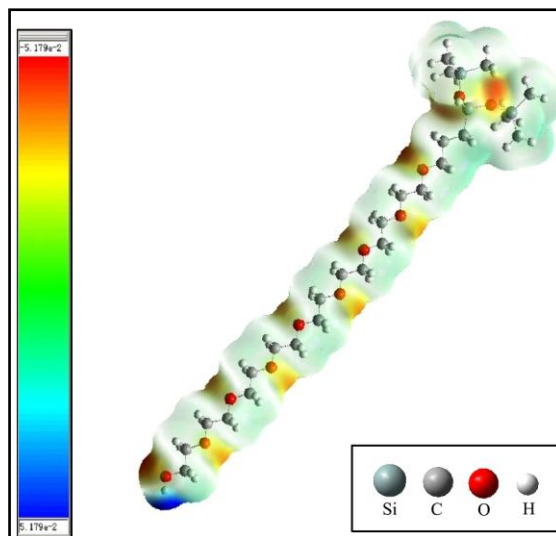

Figure S3. The configuration and electron density of Q2-5211.

**The calculation of EF is followed:[S1]**

In order to determine the enhancement effect of R6G on the assembling film, the enhancement factor (EF) values of R6G in the assembling film are determined using the following expression:

$$EF = (I_{\text{SERS}}/N_{\text{ads}}) / (I_{\text{bulk}}/N_{\text{bulk}})$$

where  $I_{\text{SERS}}$  is the intensity of a vibrational mode in the surface-enhanced spectrum,  $I_{\text{bulk}}$  is the intensity of the same mode in the Raman spectrum,  $N_{\text{ads}}$  is the number of molecules adsorbed and sampled on the SERS-active substrate, and  $N_{\text{bulk}}$  is the number of molecules sampled in the bulk.  $N_{\text{ads}}$  can be obtained according to the method proposed by Orendorff *et al.* [S2] which is

$$N_{\text{ads}} = N_{\text{d}}A_{\text{laser}}A_{\text{N}}/\sigma$$

where  $N_{\text{d}}$  is the number density of the gold nanoparticles,  $A_{\text{laser}}$  is the area of the focal spot of laser,  $A_{\text{N}}$  is the footprint area of the gold nanoparticles, and  $\sigma$  is the surface area occupied by an adsorbed R6G molecule. In order to simplify the model, we assume that patterns of gold nanoparticles are densely packed and then  $N_{\text{d}}$  can be obtained. From the TEM we find that the mean diameter of the gold nanoparticles is about 20 nm and then  $A_{\text{N}}$  can be obtained.  $A_{\text{laser}}$  can be obtained from the diameter of the laser spot ( $\sim 1 \mu\text{m}$ ). The long-axis length of an R6G molecule is ca. 1.4 nm.[S3] Therefore, one can assume that in the densely packed R6G monolayer a single R6G molecule should take no more than  $4 \text{ nm}^2$  in area, indicating that  $\sigma$  can be adopted as  $\sim 4 \text{ nm}^2/\text{molecule}$ .[S4] Then the total number of surface adsorbed molecules ( $N_{\text{ads}}$ ) within the illuminated laser spot can be obtained at  $1.54 \times 10^5$ .  $N_{\text{bulk}}$  is the molecule

number of the solid R6G in the laser illumination volume. In our experiment, the laser spot is about 1  $\mu\text{m}$  in diameter and the penetration depth is about 2  $\mu\text{m}$ . Taking the density of the solid R6G ( $1.26 \text{ g/cm}^3$ ) into account,  $N_{\text{bulk}}$  was calculated to be about  $2.49 \times 10^9$  within the illuminated laser light. The intensity of the measured light at  $1315 \text{ cm}^{-1}$  was about 27000 and 146 for SERS and ordinary Raman, respectively. Finally, the EF at the assembled film for the band located at  $1315 \text{ cm}^{-1}$  can be calculated to be about  $2.41 \times 10^6$ .

### References

- [S1] S. J. Guo, S. J. Dong and E. K. Wang, *Cryst. Growth Des.* 2009, **9**, 372.
- [S2] C. J. Orendorff, L. N. Gearheart, R. Jana and C. J. Murphy, *Phys. Chem. Chem. Phys.* 2006, **8**, 165.
- [S3] R. Sasai, T. Fujita, N. Iyi, H. Itoh and K. Takagi, *Langmuir* 2002, **18**, 6578.
- [S4] A. Kudelski, *Chem. Phys. Lett.* 2005, **414**, 271.
